# Supplementary material
Source: Elsevier journal article supplement (https://www.sciencedirect.com/science/article/pii/S0365669121002483)
Supplement: mmc1 [file S0365669121002483:mmc1.docx]

**Anexo 1.** Encuesta de calidad sobre el nuevo proceso de inyección intravítrea

1.- ¿Piensa usted que hay riesgo de contagiarse de coronavirus al acudir a consulta de mácula?

si no ns/nc

2.- ¿Piensa usted que hay riesgo de contagiarse de coronavirus al acudir a la sal de técnicas a inyectarse?

si no ns/nc

3.- ¿Cree que las medidas acometidas en la sala de técnicas para mejorar la seguridad son útiles?

si no 4.- ¿Cuál cree que es la medida más útil?

ns/nc

Reducir el número de pacientes en la sala de espera

La inyección bilateral simultanea ( los dos ojos el mismo día) El acto único ( poner la consulta y la inyección el mismo día) Otra:____________________________________

5.- Se le ocurre alguna otra medida que mejore la seguridad de la inyecciones en esta situación:

____________________________________________________________________

*ns/nc : no sabe/ no contesta
